# Supplementary material for: Community-Acquired Pneumonia among Patients with COPD in Spain from 2016 to 2019. Cohort Study Assessing Sex Differences in the Incidence and Outcomes Using Hospital Discharge Data
Source: MDPI journal article supplement (doi:10.3390/jcm10214889), 2021-10-23
Supplement: s1 [file s1]

**Table S1.** ICD-10 codes for diagnosis and therapeutic procedures used in this investigation.

| ICD-10 codes                       |                                                                                                                                                             |
|------------------------------------|-------------------------------------------------------------------------------------------------------------------------------------------------------------|
| Community-acquired pneumonia *     | J12 to J18 as primary diagnosis with a POA indicator of "Y".<br>J12 to J18 in any of the secondary diagnosis fields (2-20) and with a POA indicator of "Y". |
| Asthma                             | J45.xxx                                                                                                                                                     |
| Pulmonary tuberculosis             | A15.x                                                                                                                                                       |
| No invasive mechanical ventilation | 5A09357, 5A09457, 5A09557                                                                                                                                   |
| Invasive mechanical ventilation    | 5A1945Z, 5A1955Z, 5A1935Z                                                                                                                                   |

\*Each discharge diagnosis has a "Present on Admission (POA)" indicator assigned according to the ICD-10-CM Official Guidelines for Coding and Reporting (<https://icdlist.com/icd-10/guidelines/>). The reporting options and definitions for POA are "Y" (present at admission); "N" (not present at admission); "U" (lack documentation to determine presence at admission); "W" (provider is unable to clinically determine if the condition was present); and unreported/not used.

**Table S2.** Multivariable analysis of factors associated with in-hospital mortality during admissions for community-acquired pneumonia, among patients not suffering chronic obstructive pulmonary disease according to sex.

|                                     | MEN             | WOMEN           | BOTH            |
|-------------------------------------|-----------------|-----------------|-----------------|
|                                     | OR (95%CI)      | OR (95%CI)      | OR (95%CI)      |
| 40-64 years old, n (%)              | 1               | 1               | 1               |
| 50-64 years old, n (%)              | 1.44(1.38-1.51) | 1.47(1.37-1.57) | 1.45(1.4-1.51)  |
| 65-74 years old, n (%)              | 2.16(2.07-2.26) | 2.73(2.57-2.9)  | 2.34(2.26-2.42) |
| ≥ 85 years old, n (%)               | 3.82(3.65-3.99) | 4.98(4.7-5.28)  | 4.22(4.07-4.36) |
| Myocardial infarction               | 1.07(1.01-1.12) | 1.3(1.21-1.4)   | 1.13(1.08-1.18) |
| Congestive heart failure            | 1.33(1.29-1.37) | 1.28(1.24-1.32) | 1.31(1.28-1.34) |
| Cerebrovascular disease             | 1.43(1.37-1.5)  | 1.57(1.5-1.65)  | 1.49(1.45-1.55) |
| Dementia                            | 2.13(2.05-2.22) | 1.91(1.84-1.98) | 2.01(1.96-2.07) |
| T2DM                                | 0.89(0.87-0.92) | 0.94(0.91-0.97) | 0.92(0.9-0.94)  |
| Hemiplegia or paraplegia            | 1.88(1.69-2.1)  | 1.99(1.73-2.28) | 1.93(1.77-2.11) |
| Renal disease                       | 1.14(1.1-1.17)  | 1.2(1.16-1.24)  | 1.16(1.14-1.19) |
| Cancer                              | 2.1(2.02-2.18)  | 2.19(2.07-2.3)  | 2.12(2.06-2.19) |
| Moderate/severe liver disease       | 3.15(2.89-3.44) | 2.95(2.57-3.38) | 3.12(2.9-3.36)  |
| Metastatic cancer                   | 5.71(5.47-5.96) | 6.62(6.21-7.05) | 5.98(5.77-6.19) |
| AIDS                                | 1.18(1.03-1.36) | NS              | 1.23(1.09-1.4)  |
| Asthma                              | 0.87(0.82-0.92) | 0.60(0.56-0.63) | 0.72(0.70-0.74) |
| Non-Invasive Mechanical ventilation | 2.93(2.75-3.13) | 2.71(2.52-2.91) | 2.83(2.7-2.97)  |
| Invasive Mechanical ventilation     | 8.11(7.67-8.57) | 8.88(8.22-9.59) | 8.37(8-8.76)    |
| 2016                                | 1               | 1               | 1               |
| 2017                                | 0.97(0.94-1.01) | 0.97(0.93-1.01) | 0.97(0.94-1)    |
| 2018                                | 0.93(0.9-0.97)  | 0.93(0.89-0.97) | 0.93(0.91-0.96) |
| 2019                                | 0.87(0.84-0.9)  | 0.86(0.83-0.9)  | 0.87(0.84-0.89) |
| Women                               | NA              | NA              | 1               |
| Men                                 | NA              | NA              | 1.08(1.06-1.1)  |

T2DM: type 2 diabetes mellitus; AIDS: acquired immune deficiency syndrome; NA: not applicable. NS: not significant. The absence of the condition or procedure is used as the reference category.
