# Supplementary figures and images for: Community-Acquired Pneumonia among Patients with COPD in Spain from 2016 to 2019. Cohort Study Assessing Sex Differences in the Incidence and Outcomes Using Hospital Discharge Data
Source: MDPI journal article supplement (doi:10.3390/jcm10214889), 2021-10-23

Figure S1. Flow chart of patient's selection and hospital outcome according COPD status and sex

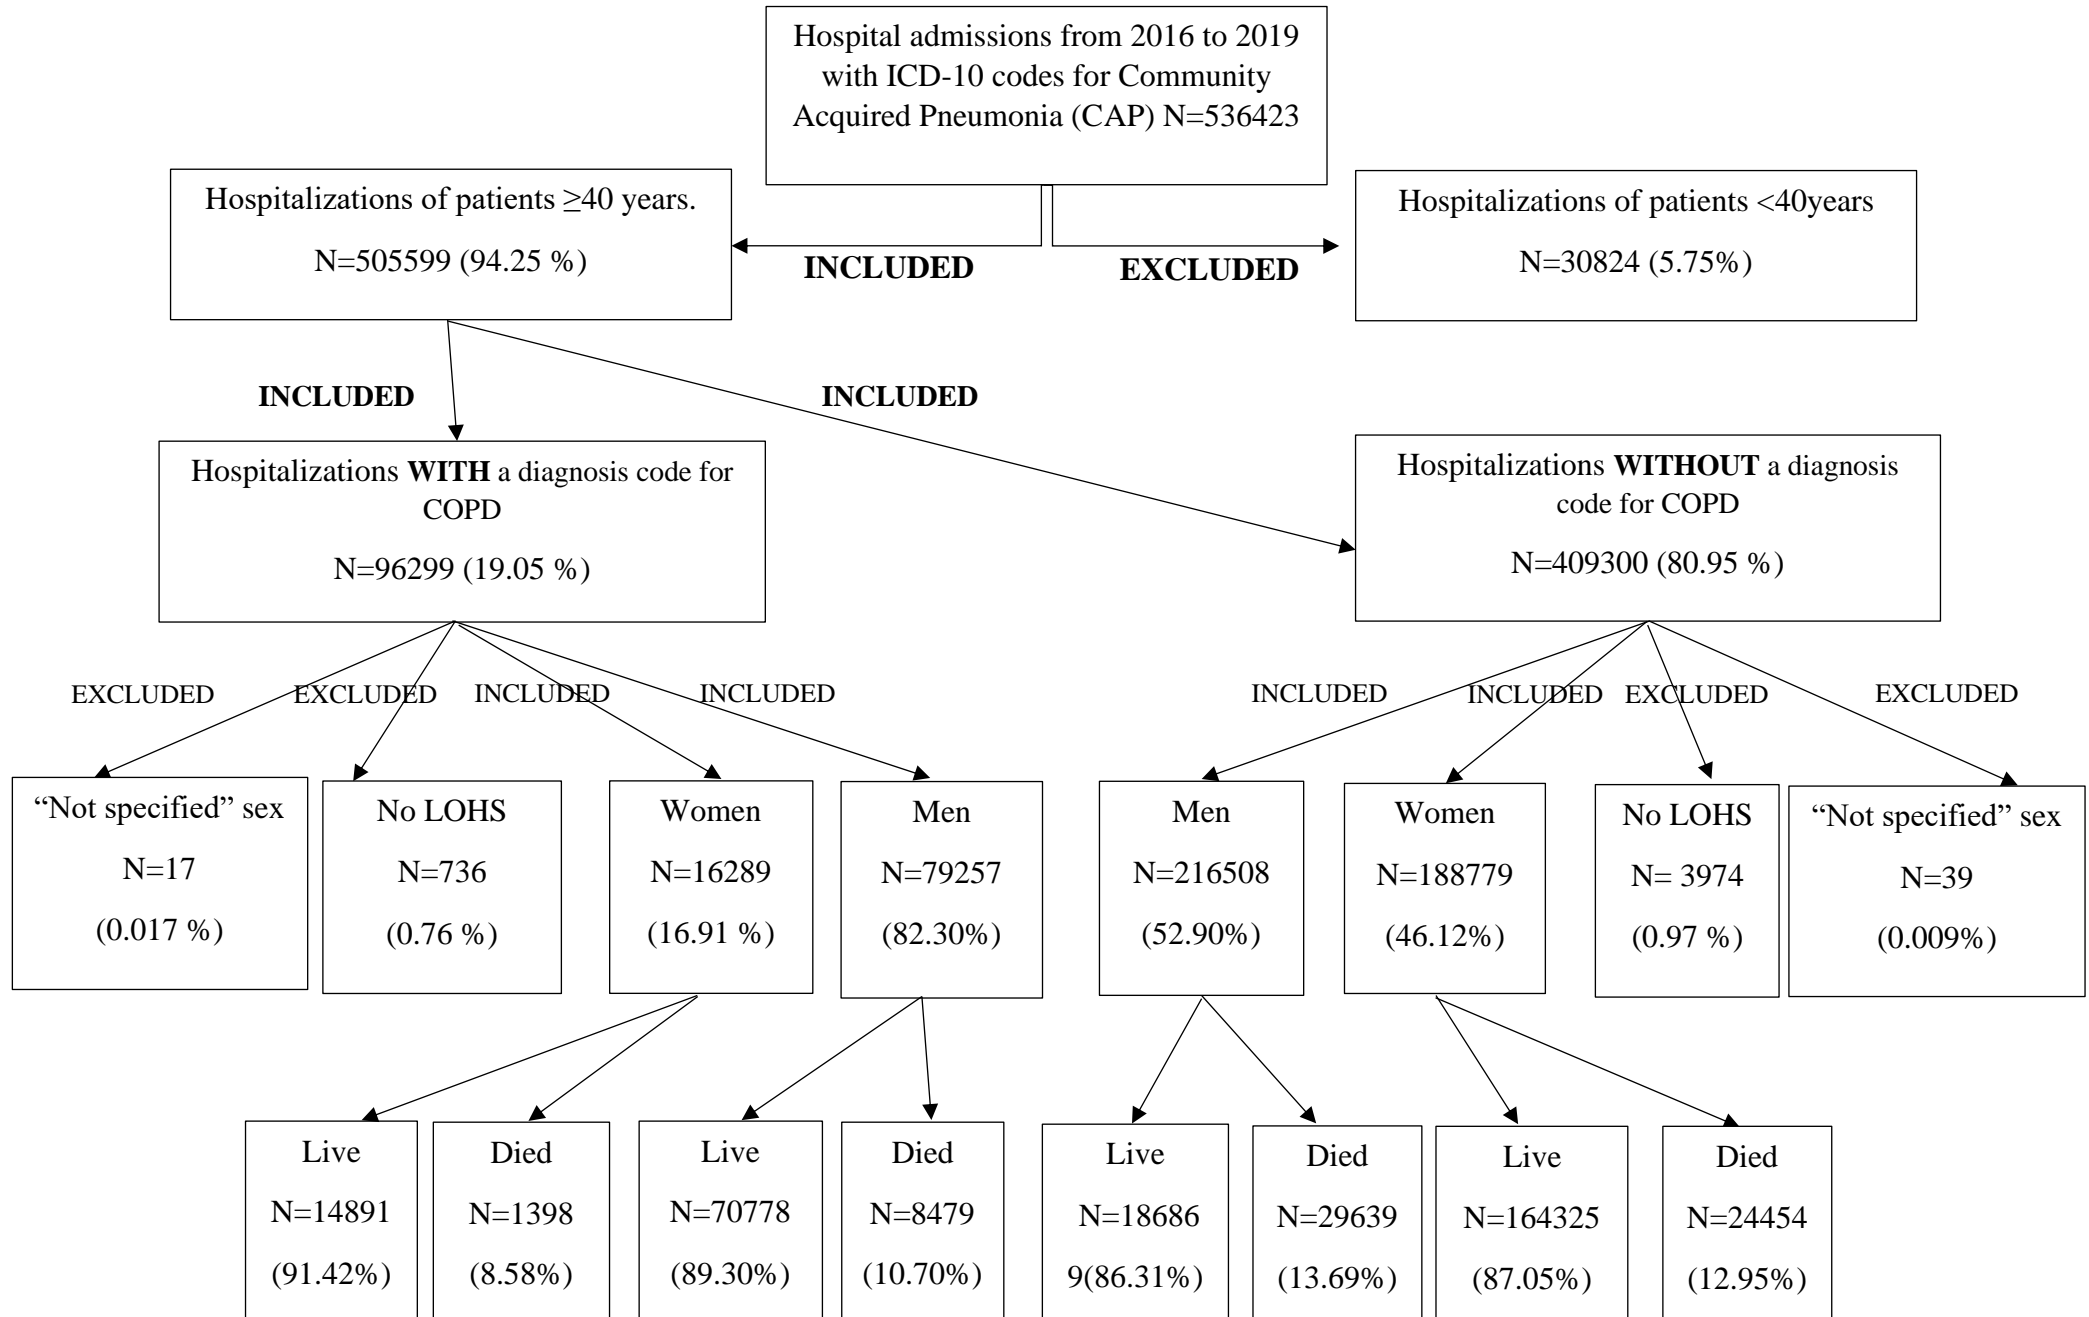

Supplement: s1 [file s1]
